# Supplementary material
Source: publisher figshare collection journal article supplement (https://gsapubs.figshare.com/ndownloader/files/34835943)
Supplement: Supplementary file 1 [file 34835943]

## Sheet: Sheet1
Depth (cm)	Red/Green
1080.67	1.5
1080.87	1.20139
1081.07	1.17059
1081.27	1.19048
1081.47	1.16667
1081.67	1.20161
1081.87	1.16026
1082.07	1.20635
1082.27	1.19286
1082.47	1.18121
1082.67	1.18182
1082.87	1.19231
1083.07	1.19745
1083.27	1.2
1083.47	1.18182
1083.67	1.1831
1083.87	1.2027
1084.07	1.19079
1084.27	1.20261
1084.47	1.21528
1084.67	1.18841
1084.87	1.22222
1085.07	1.20667
1085.27	1.20548
1085.47	1.21088
1085.67	1.19608
1085.87	1.2027
1086.07	1.18954
1086.27	1.18493
1086.47	1.19178
1086.67	1.20144
1086.87	1.1875
1087.07	1.19565
1087.27	1.19424
1087.47	1.19549
1087.67	1.17647
1087.87	1.17172
1088.07	1.19753
1088.27	1.18852
1088.47	1.17687
1088.67	1.20769
1088.87	1.20714
1089.07	1.19178
1089.27	1.18543
1089.47	1.18667
1089.67	1.19108
1089.87	1.19333
1090.07	1.20588
1090.27	1.24786
1090.47	1.19853
1090.67	1.17949
1090.87	1.17576
1091.07	1.16667
1091.27	1.216
1091.47	1.184
1091.67	1.16667
1091.87	1.23214
1092.07	1.23333
1092.27	1.18367
1092.47	1.18621
1092.67	1.1875
1092.87	1.1931
1093.07	1.19463
1093.27	1.18667
1093.47	1.19863
1093.67	1.19565
1093.87	1.2
1094.07	1.18254
1094.27	1.21951
1094.47	1.19565
1094.67	1.19728
1094.87	1.19205
1095.07	1.19048
1095.27	1.2
1095.47	1.17949
1095.67	1.17722
1095.87	1.17901
1096.07	1.18
1096.27	1.18243
1096.47	1.18012
1096.67	1.18125
1096.87	1.18125
1097.07	1.18902
1097.27	1.15
1097.47	1.17241
1097.67	1.17647
1097.87	1.19231
1098.07	1.18868
1098.27	1.17544
1098.47	1.17391
1098.67	1.17751
1098.87	1.18405
1099.07	1.19255
1099.27	1.1747
1099.47	1.17178
1099.67	1.16667
1099.87	1.18919
1100.07	1.1573
1100.27	1.18519
1100.47	1.20588
1100.67	1.2
1100.87	1.1761
1101.07	1.18248
1101.27	1.1811
1101.47	1.21538
1101.67	1.18978
1101.87	1.21374
1102.07	1.20968
1102.27	1.19531
1102.47	1.19672
1102.67	1.19259
1102.87	1.20149
1103.07	1.20438
1103.27	1.17881
1103.47	1.18121
1103.67	1.18919
1103.87	1.18978
1104.07	1.17647
1104.27	1.18792
1104.47	1.18881
1104.67	1.18881
1104.87	1.17808
1105.07	1.1844
1105.27	1.21374
1105.47	1.22222
1105.67	1.23333
1105.87	1.24528
1106.07	1.22609
1106.27	1.21186
1106.47	1.22727
1106.67	1.21101
1106.87	1.23214
1107.07	1.20833
1107.27	1.22642
1107.47	1.22321
1107.67	1.19531
1107.87	1.22314
1108.07	1.21667
1108.27	1.21429
1108.47	1.20492
1108.67	1.22727
1108.87	1.2
1109.07	1.1938
1109.27	1.20588
1109.47	1.21739
1109.67	1.21311
1109.87	1.20833
1110.07	1.20833
1110.27	1.2
1110.47	1.2087
1110.67	1.21311
1110.87	1.21488
1111.07	1.22034
1111.27	1.22414
1111.47	1.22131
1111.67	1.21014
1111.87	1.225
1112.07	1.22314
1112.27	1.18421
1112.47	1.2
1112.67	1.27143
1112.87	1.20779
1113.07	1.19737
1113.27	1.24528
1113.47	1.23684
1113.67	1.24074
1113.87	1.2193
1114.07	1.20455
1114.27	1.23423
1114.47	1.21774
1114.67	1.23256
1114.87	1.21324
1115.07	1.22131
1115.27	1.22321
1115.47	1.27059
1115.67	1.23596
1115.87	1.23301
1116.07	1.22772
1116.27	1.23711
1116.47	1.21782
1116.67	1.21667
1116.87	1.23
1117.07	1.25532
1117.27	1.20988
1117.47	1.20213
1117.67	1.22414
1117.87	1.21905
1118.07	1.22018
1118.27	1.23711
1118.47	1.21569
1118.67	1.22642
1118.87	1.22414
1119.07	1.24176
1119.27	1.23301
1119.47	1.23404
1119.67	1.2619
1119.87	1.26966
1120.07	1.27381
1120.27	1.24762
1120.47	1.25806
1120.67	1.26882
1120.87	1.21875
1121.07	1.42857
1121.27	1.20213
1121.47	1.23333
1121.67	1.25532
1121.87	1.25581
1122.07	1.2381
1122.27	1.22581
1122.47	1.20896
1122.67	1.20144
1122.87	1.19728
1123.07	1.18354
1123.27	1.20714
1123.47	1.19853
1123.67	1.19286
1123.87	1.19424
1124.07	1.18868
1124.27	1.2028
1124.47	1.21642
1124.67	1.22308
1124.87	1.1875
1125.07	1.23077
1125.27	1.21154
1125.47	1.21875
1125.67	1.20325
1125.87	1.23423
1126.07	1.21429
1126.27	1.22881
1126.47	1.21429
1126.67	1.24074
1126.87	1.23276
1127.07	1.25472
1127.27	1.23636
1127.47	1.23077
1127.67	1.25217
1127.87	1.24779
1128.07	1.22222
1128.27	1.2314
1128.47	1.23913
1128.67	1.2451
1128.87	1.22807
1129.07	1.25664
1129.27	1.22047
1129.47	1.20769
1129.67	1.22951
1129.87	1.2381
1130.07	1.25472
1130.27	1.26087
1130.47	1.33333
1130.67	1.20779
1130.87	1.24468
1131.07	1.25
1131.27	1.23944
1131.47	1.2439
1131.67	1.23596
1131.87	1.2439
1132.07	1.24096
1132.27	1.23596
1132.47	1.23077
1132.67	1.23404
1132.87	1.18
1133.07	1.25
1133.27	1.22826
1133.47	1.23656
1133.67	1.23256
1133.87	1.23596
1134.07	1.24096
1134.27	1.2381
1134.47	1.22667
1134.67	1.24324
1134.87	1.22892
1135.07	2
1135.27	1.2451
1135.47	1.2439
1135.67	1.23864
1135.87	1.23529
1136.07	1.23958
1136.27	1.22892
1136.47	1.24096
1136.67	1.22368
1136.87	1.24096
1137.07	1.25
1137.27	1.17857
1137.47	1.24324
1137.67	1.24138
1137.87	1.2451
1138.07	1.24176
1138.27	1.24444
1138.47	1.24138
1138.67	1.24468
1138.87	1.25275
1139.07	1.23529
1139.27	1.25287
1139.47	1.26136
1139.67	1.23333
1139.87	1.27632
1140.07	1.24138
1140.27	1.24706
1140.47	1.23684
1140.67	1.2375
1140.87	1.22353
1141.07	1.24096
1141.27	1.23529
1141.47	1.2439
1141.67	1.24444
1141.87	1.24
1142.07	1.24419
1142.27	1.23171
1142.47	1.25
1142.67	1.23377
1142.87	1.25301
1143.07	1.22093
1143.27	1.22472
1143.47	1.21429
1143.67	1.22388
1143.87	1.275
1144.07	1.21569
1144.27	1.22727
1144.47	1.22222
1144.67	1.21053
1144.87	1.23077
1145.07	1.25333
1145.27	1.25333
1145.47	1.25
1145.67	1.25
1145.87	1.27632
1146.07	1.24675
1146.27	1.22078
1146.47	1.24658
1146.67	1.23611
1146.87	1.24638
1147.07	1.22535
1147.27	1.20833
1147.47	1.22535
1147.67	1.21951
1147.87	1.22727
1148.07	1.23171
1148.27	1.22222
1148.47	1.24675
1148.67	1.26471
1148.87	1.21212
1149.07	1.23077
1149.27	1.2
1149.47	1.20635
1149.67	1.20968
1149.87	1.27586
1150.07	1.2069
1150.27	1.20339
1150.47	1.20339
1150.67	1.18966
1150.87	1.19355
1151.07	1.20339
1151.27	1.18966
1151.47	1.19048
1151.67	1.20833
1151.87	1.15789
1152.07	1.25
1152.27	1.22807
1152.47	1.20635
1152.67	1.20339
1152.87	1.20635
1153.07	1.22034
1153.27	1.23333
1153.47	1.21875
1153.67	1.2381
1153.87	1.21311
1154.07	1.21212
1154.27	1.20312
1154.47	1.2
1154.67	1.17742
1154.87	1.19118
1155.07	1.19355
1155.27	1.22034
1155.47	1.22581
1155.67	1.20968
1155.87	1.19355
1156.07	1.23636
1156.27	1.2037
1156.47	1.22642
1156.67	1.21818
1156.87	1.19565
1157.07	1.21739
1157.27	1.19298
1157.47	1.21053
1157.67	1.19298
1157.87	1.21429
1158.07	1.19355
1158.27	1.1831
1158.47	1.1875
1158.67	1.2027
1158.87	1.18919
1159.07	1.19178
1159.27	1.18182
1159.47	1
1159.67	1.18519
1159.87	1.18571
1160.07	1.18987
1160.27	1.18182
1160.47	1.17105
1160.67	1.18919
1160.87	1.1875
1161.07	1.19737
1161.27	1.13793
1161.47	1.17949
1161.67	1.19118
1161.87	1.18056
1162.07	1.17568
1162.27	1.1831
1162.47	1.20548
1162.67	1.18056
1162.87	1.1791
1163.07	1.18182
1163.27	1.18182
1163.47	1.18182
1163.67	1.17949
1163.87	1.175
1164.07	1.17333
1164.27	1.17284
1164.47	1.18072
1164.67	1.19231
1164.87	1.21795
1165.07	1.19178
1165.27	1.19753
1165.47	1.16867
1165.67	1.17241
1165.87	1.175
1166.07	1.19481
1166.27	1.175
1166.47	1.18841
1166.67	1.1875
1166.87	1.19565
1167.07	1.2
1167.27	1.19588
1167.47	1.19388
1167.67	1.17172
1167.87	1.15957
1168.07	1.17568
1168.27	1.2043
1168.47	1.17708
1168.67	1.17204
1168.87	1.19588
1169.07	1.17172
1169.27	1.17822
1169.47	1.17347
1169.67	1.17
1169.87	1.18627
1170.07	1.18
1170.27	1.18
1170.47	1.18182
1170.67	1.15385
1170.87	1.16667
1171.07	1.17647
1171.27	1.18182
1171.47	1.19048
1171.67	1.19388
1171.87	1.2
1172.07	1.19048
1172.27	1.18919
1172.47	1.18812
1172.67	1.16667
1172.87	1.18812
1173.07	1.17708
1173.27	1.25641
1173.47	1.16327
1173.67	1.16842
1173.87	1.21795
1174.07	1.17708
1174.27	1.18947
1174.47	1.20513
1174.67	1.15476
1174.87	1.16304
1175.07	1.16667
1175.27	1.18824
1175.47	1.20482
1175.67	1.1978
1175.87	1.26582
1176.07	1.23684
1176.27	1.1828
1176.47	1.17021
1176.67	1.1828
1176.87	1.18681
1177.07	1.17822
1177.27	1.18
1177.47	1.21429
1177.67	1.20833
1177.87	1.20388
1178.07	1.20455
1178.27	1.1954
1178.47	1.20482
1178.67	1.12
1178.87	1.20455
1179.07	1.2
1179.27	1.22222
1179.47	1.21176
1179.67	1.2069
1179.87	1.21111
1180.07	1.21429
1180.27	1.21505
1180.47	1.21053
1180.67	1.21591
1180.87	1.19512
1181.07	1.21591
1181.27	1.18681
1181.47	1.19101
1181.67	1.18367
1181.87	1.19417
1182.07	1.23684
1182.27	1.1875
1182.47	1.18095
1182.67	1.19444
1182.87	1.2
1183.07	1.17647
1183.27	1.1875
1183.47	1.19792
1183.67	1.21053
1183.87	1.19388
1184.07	1.19388
1184.27	1.20652
1184.47	1.19388
1184.67	1.19802
1184.87	1.24706
1185.07	1.29412
1185.27	1.2
1185.47	1.21277
1185.67	1.22581
1185.87	1.23596
1186.07	1.21111
1186.27	1.22093
1186.47	1.20652
1186.67	1.21875
1186.87	1.21176
1187.07	1.2093
1187.27	1.21176
1187.47	1.2
1187.67	1.18841
1187.87	1.23171
1188.07	1.22078
1188.27	1.20513
1188.47	1.2
1188.67	1.21687
1188.87	1.21176
1189.07	1.21687
1189.27	1.22078
1189.47	1.225
1189.67	1.22973
1189.87	1.23288
1190.07	1.2381
1190.27	1.23529
1190.47	1.24051
1190.67	1.23529
1190.87	1.2381
1191.07	1.25882
1191.27	1.24706
1191.47	1.2625
1191.67	1.29167
1191.87	1.27273
1192.07	1.23881
1192.27	1.22388
1192.47	1.2
1192.67	1.24675
1192.87	1.24675
1193.07	1.275
1193.27	1.25333
1193.47	1.25333
1193.67	1.25333
1193.87	1.26667
1194.07	1.26316
1194.27	1.31944
1194.47	1.30667
1194.67	1.29167
1194.87	1.28571
1195.07	1.2973
1195.27	1.26667
1195.47	1.31034
1195.67	1.28
1195.87	1.28767
1196.07	1.26316
1196.27	1.27778
1196.47	1.27778
1196.67	1.26027
1196.87	1.27778
1197.07	1.26562
1197.27	1.32653
1197.47	1.30137
1197.67	1.3
1197.87	1.31034
1198.07	1.32258
1198.27	1.28571
1198.47	1.30159
1198.67	1.28571
1198.87	1.29032
1199.07	1.29091
1199.27	1.3125
1199.47	1.32787
1199.67	1.33333
1199.87	1.31746
1200.07	1.33846
1200.27	1.34426
1200.47	1.33333
1200.67	1.3
1200.87	1.31034
1201.07	1.31667
1201.27	1.33898
1201.47	1.33333
1201.67	1.31111
1201.87	1.31034
1202.07	1.31746
1202.27	1.31667
1202.47	1.32203
1202.67	1.30769
1202.87	1.32258
1203.07	1.31746
1203.27	1.32759
1203.47	1.32787
1203.67	1.32787
1203.87	1.32203
1204.07	1.3
1204.27	1.33333
1204.47	1.32759
1204.67	1.29825
1204.87	1.31034
1205.07	1.33333
1205.27	1.33333
1205.47	1.32203
1205.67	1.34483
1205.87	1.32759
1206.07	1.34483
1206.27	1.34
1206.47	1.32353
1206.67	1.32353
1206.87	1.30508
1207.07	1.32203
1207.27	1.33898
1207.47	1.32759
1207.67	1.31667
1207.87	1.32812
1208.07	1.32258
1208.27	1.33333
1208.47	1.33898
1208.67	1.32258
1208.87	1.35
1209.07	1.34483
1209.27	1.35484
1209.47	1.35
1209.67	1.35593
1209.87	1.34483
1210.07	1.35
1210.27	1.35
1210.47	1.35
1210.67	1.36207
1210.87	1.35
1211.07	1.36667
1211.27	1.36207
1211.47	1.35088
1211.67	1.35
1211.87	1.36207
1212.07	1.33333
1212.27	1.35
1212.47	1.34483
1212.67	1.33898
1212.87	1.33898
1213.07	1.34426
1213.27	1.36207
1213.47	1.375
1213.67	1.37931
1213.87	1.37705
1214.07	1.35484
1214.27	1.36667
1214.47	1.36066
1214.67	1.36207
1214.87	1.33333
1215.07	1.39286
1215.27	1.38182
1215.47	1.41026
1215.67	1.4
1215.87	1.40741
1216.07	1.40741
1216.27	1.375
1216.47	1.41509
1216.67	1.36207
1216.87	1.4
1217.07	1.41818
1217.27	1.375
1217.47	1.40741
1217.67	1.41071
1217.87	1.41071
1218.07	1.42593
1218.27	1.43396
1218.47	1.40741
1218.67	1.37037
1218.87	1.45283
1219.07	1.42105
1219.27	1.41379
1219.47	1.42105
1219.67	1.41667
1219.87	1.46154
1220.07	1.4717
1220.27	1.45455
1220.47	1.43478
1220.67	1.40909
1220.87	1.40678
1221.07	1.42105
1221.27	1.45098
1221.47	1.44231
1221.67	1.45283
1221.87	1.43396
1222.07	1.44231
1222.27	1.44898
1222.47	1.42308
1222.67	1.32143
1222.87	1.29825
1223.07	1.29091
1223.27	1.28846
1223.47	1.28302
1223.67	1.32692
1223.87	1.33962
1224.07	1.36735
1224.27	1.25
1224.47	1.21739
1224.67	1.2069
1224.87	1.18182
1225.07	1.2
1225.27	1.19298
1225.47	1.23214
1225.67	1.21429
1225.87	1.22034
1226.07	1.2069
1226.27	1.22414
1226.47	1.18182
1226.67	1.19643
1226.87	1.22414
1227.07	1.20408
1227.27	1.2381
1227.47	1.25
1227.67	1.21277
1227.87	1.23214
1228.07	1.28302
1228.27	1.25455
1228.47	1.2037
1228.67	1.16981
1228.87	1.18182
1229.07	1.18182
1229.27	1.2037
1229.47	1.20755
1229.67	1.20755
1229.87	1.17308
1230.07	1.17308
1230.27	1.16667
1230.47	1.19231
1230.67	1.17308
1230.87	1.2
1231.07	1.16981
1231.27	1.14
1231.47	1.16
1231.67	1.18
1231.87	1.16667
1232.07	1.16327
1232.27	1.16667
1232.47	1.17778
1232.67	1.38462
1232.87	1.37
1233.07	1.15

## Sheet: G49956
Zhou, Y., and McManus, J., 2022, Extensive evidence for a last interglacial Laurentide outburst (LILO) event: Geology, v. 50, https://doi.org/10.1130/G49956.1
